CORRECTION

# Correction: Source Apportionment and Risk Assessment of Emerging Contaminants: An Approach of Pharmaco-Signature in Water Systems

The *PLOS ONE* Staff

Hyphens were incorrectly omitted from the first three authors' first names. The correct names are: Jheng-Jie Jiang, Chon-Lin Lee, and Meng-Der Fang. The correct citation is: Jiang J-J, Lee C-L, Fang M-D, Boyd KG, Gibb SW (2015) Source Apportionment and Risk Assessment of Emerging Contaminants: An Approach of Pharmaco-Signature in Water Systems. *PLoS ONE* 10(4): e0122813. doi:[10.1371/journal.pone.0122813](https://doi.org/10.1371/journal.pone.0122813). The publisher apologizes for these errors.

## Reference

1. Jiang JJ, Lee CL, Fang MD, Boyd KG, Gibb SW (2015) Source Apportionment and Risk Assessment of Emerging Contaminants: An Approach of Pharmaco-Signature in Water Systems. *PLoS ONE* 10(4): e0122813. doi: [10.1371/journal.pone.0122813](https://doi.org/10.1371/journal.pone.0122813) PMID: [25874375](https://pubmed.ncbi.nlm.nih.gov/25874375/)

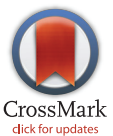

## OPEN ACCESS

**Citation:** The *PLOS ONE* Staff (2015) Correction: Source Apportionment and Risk Assessment of Emerging Contaminants: An Approach of Pharmaco-Signature in Water Systems. *PLoS ONE* 10(5): e0129410. doi:[10.1371/journal.pone.0129410](https://doi.org/10.1371/journal.pone.0129410)

**Published:** May 26, 2015

**Copyright:** © 2015 The PLOS ONE Staff. This is an open access article distributed under the terms of the [Creative Commons Attribution License](https://creativecommons.org/licenses/by/4.0/), which permits unrestricted use, distribution, and reproduction in any medium, provided the original author and source are credited.
